# Supplementary figures and images for: Mapping the conformational landscape of a dynamic enzyme by multitemperature and XFEL crystallography
Source: eLife journal article supplement (doi:10.7554/elife.07574), 2015-09-30

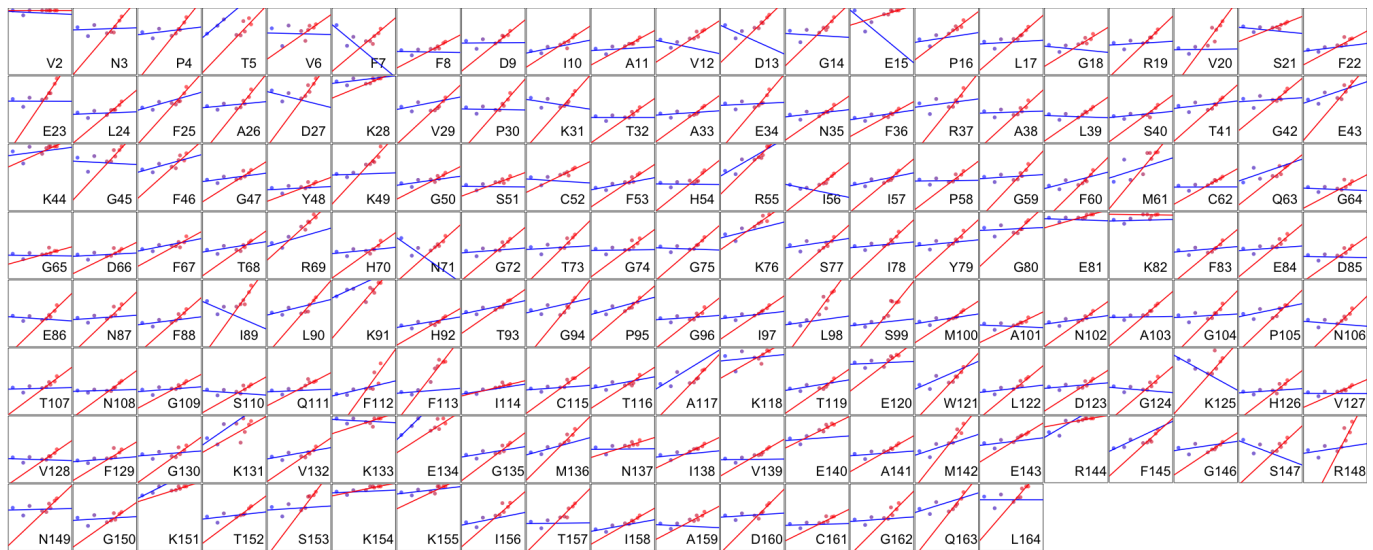

Supplement: supp [file elife-07574-supp-v1.zip]

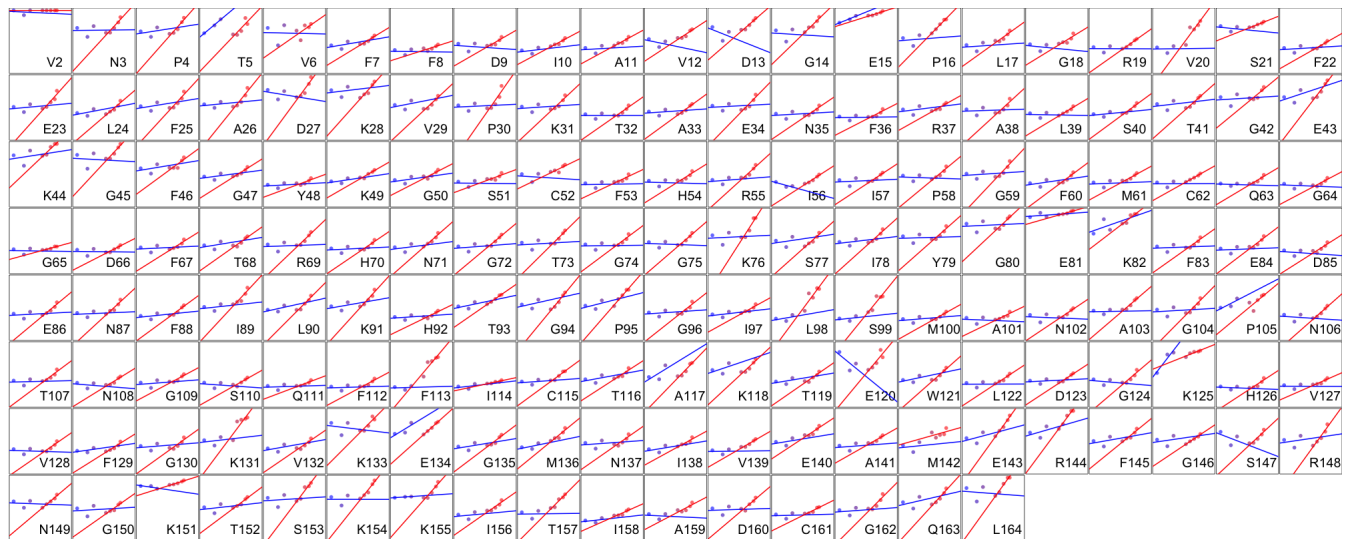

Supplement: supp [file elife-07574-supp-v1.zip]

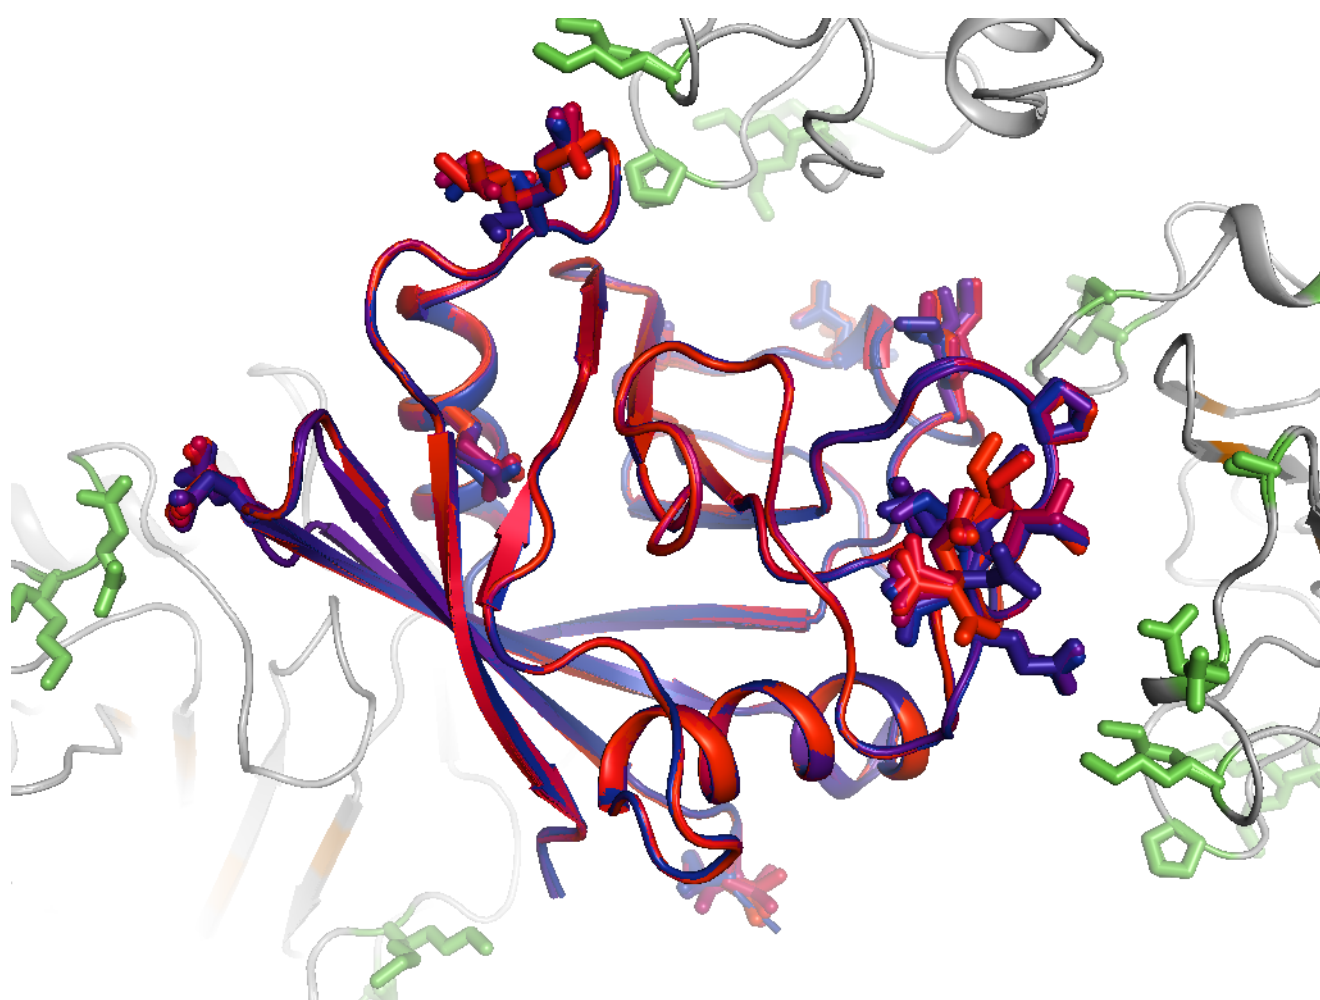

Supplement: supp [file elife-07574-supp-v1.zip]

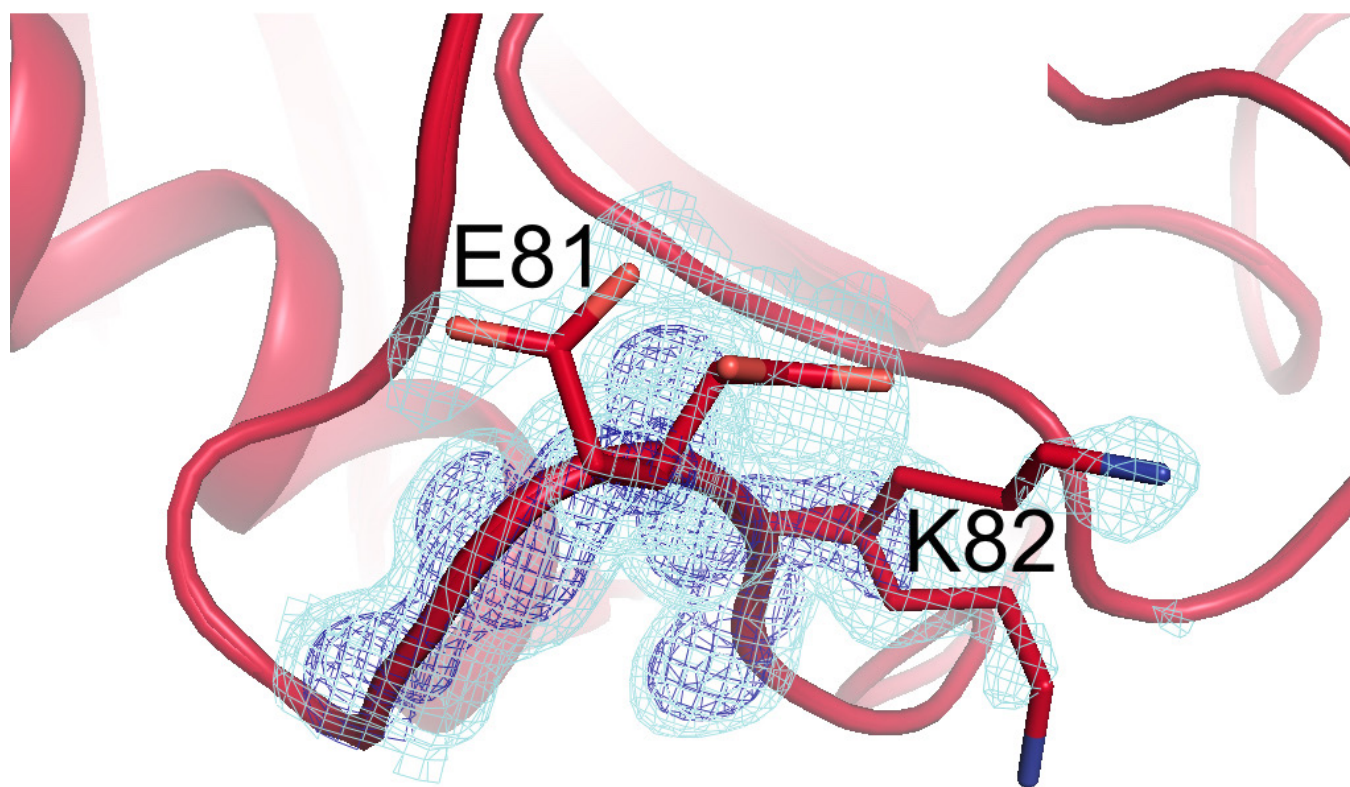

Supplement: supp [file elife-07574-supp-v1.zip]

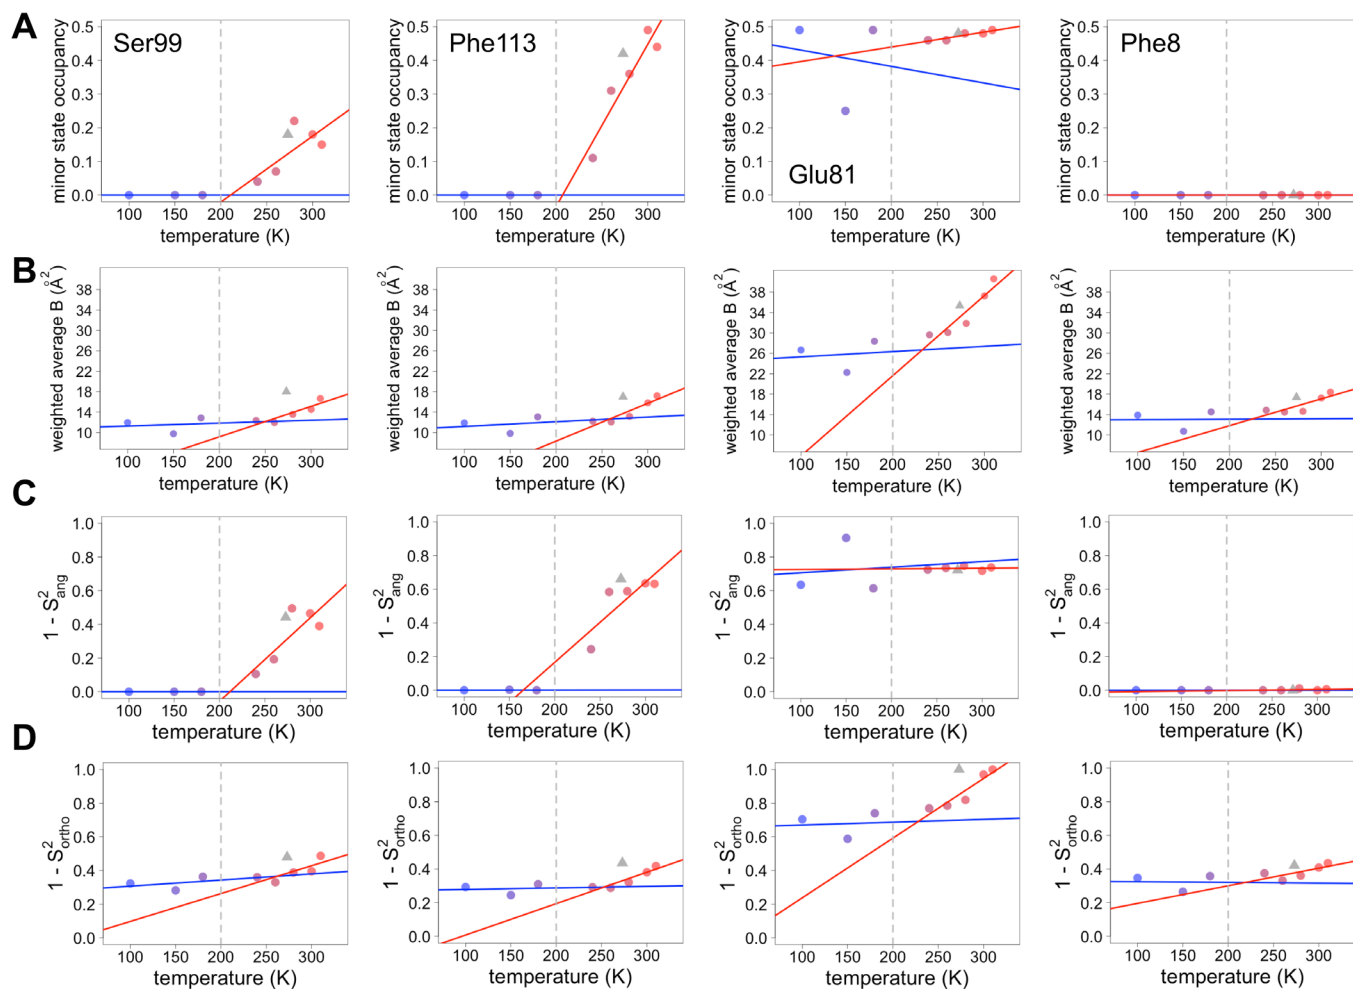

Supplement: supp [file elife-07574-supp-v1.zip]

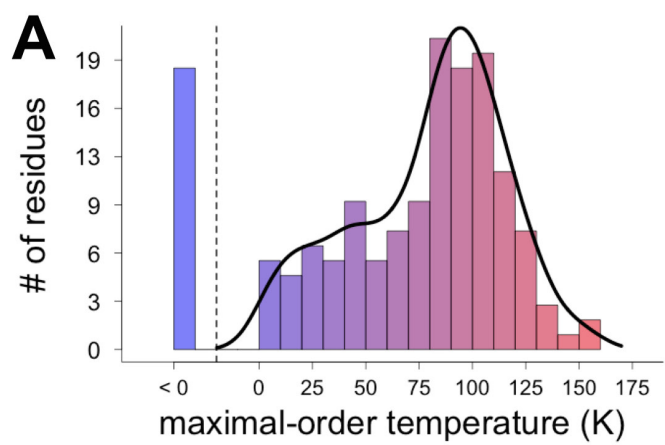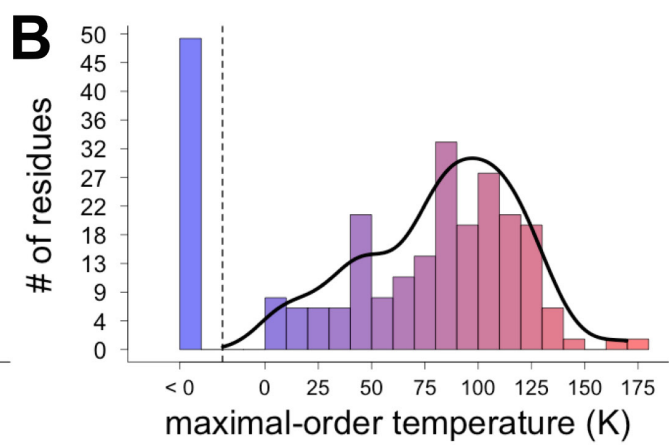

Supplement: supp [file elife-07574-supp-v1.zip]

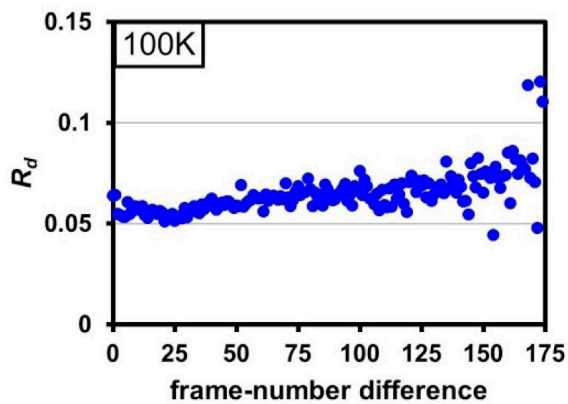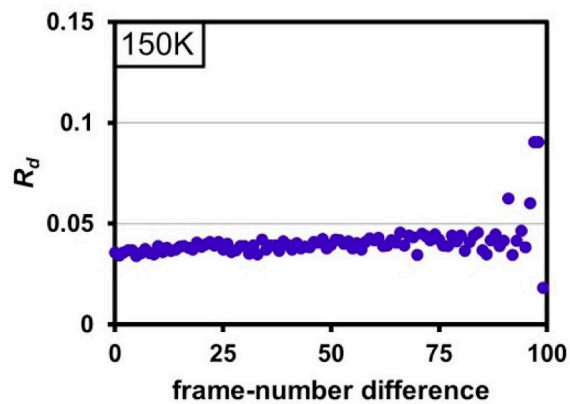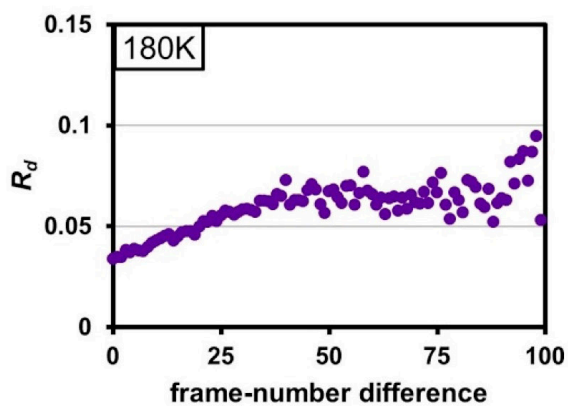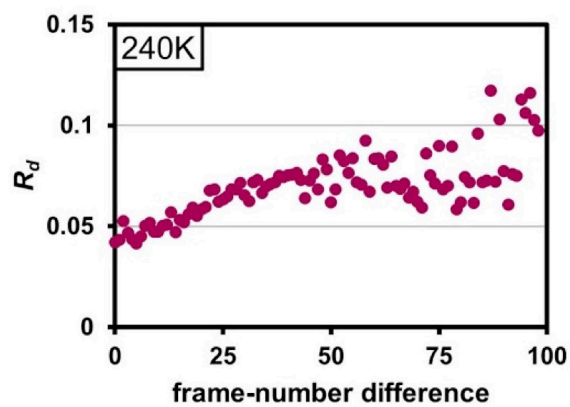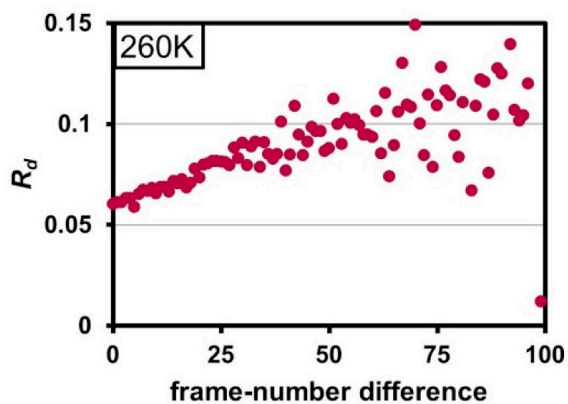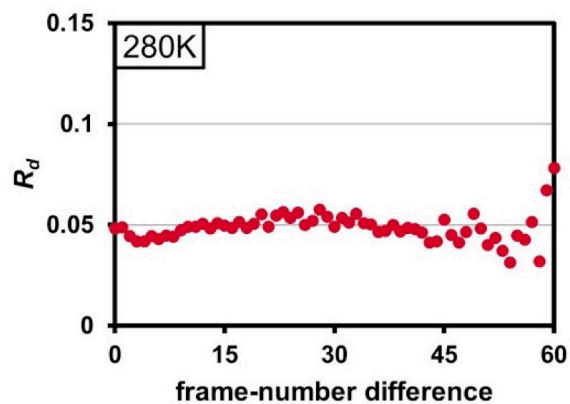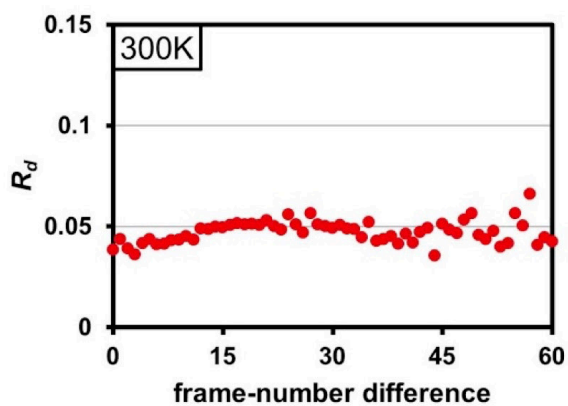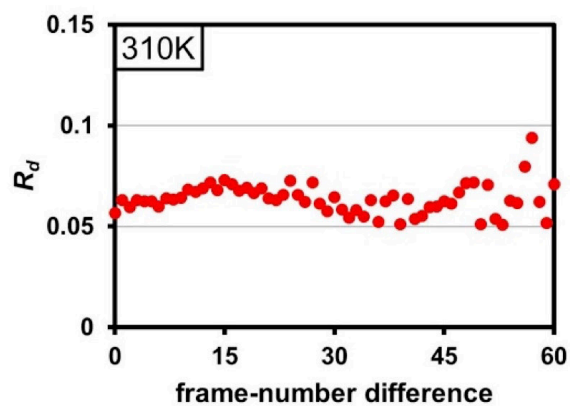

Supplement: supp [file elife-07574-supp-v1.zip]

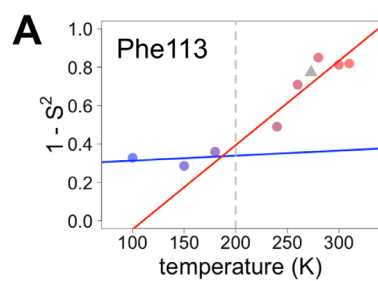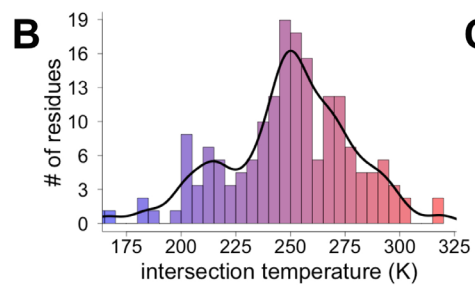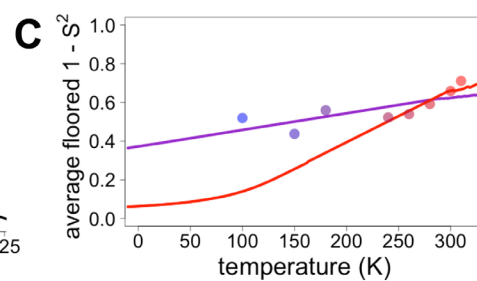

Supplement: supp [file elife-07574-supp-v1.zip]

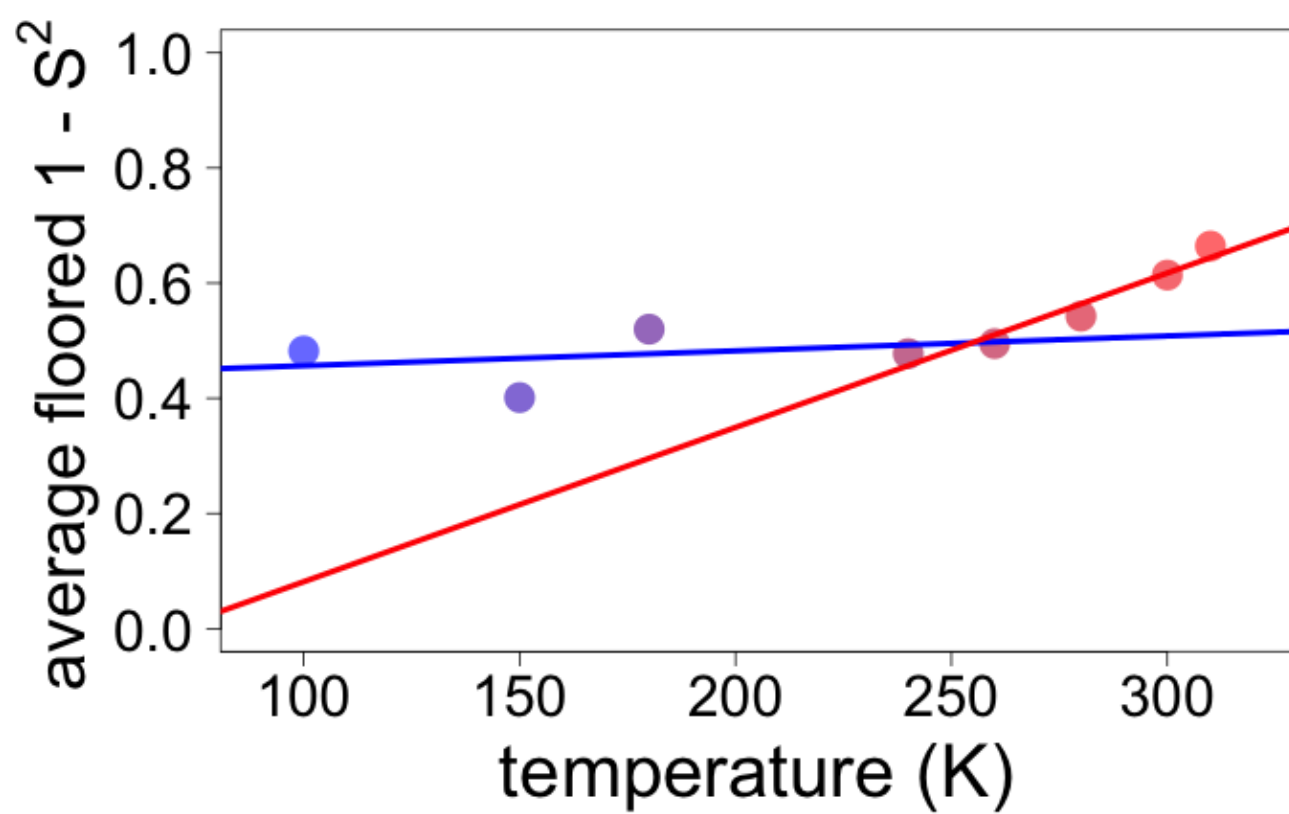

Supplement: supp [file elife-07574-supp-v1.zip]

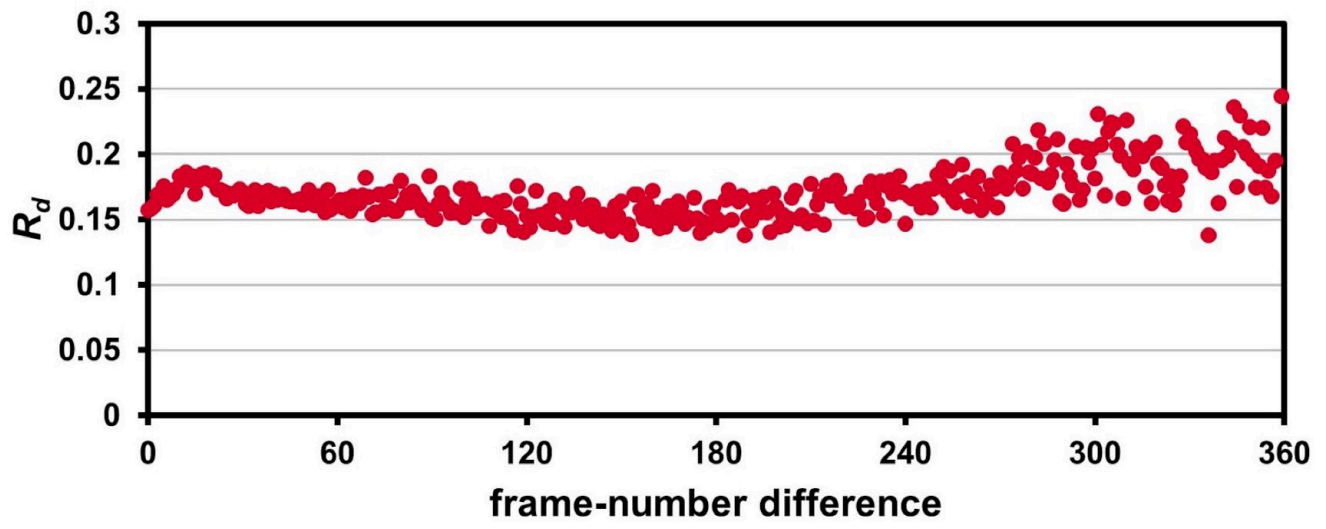

Supplement: supp [file elife-07574-supp-v1.zip]

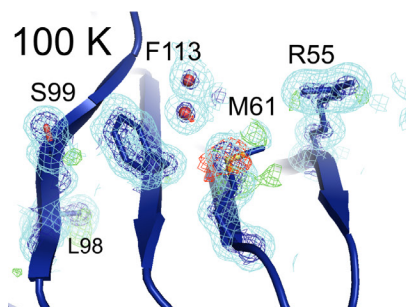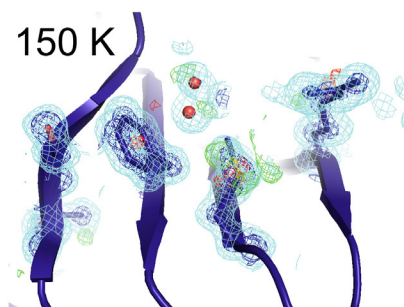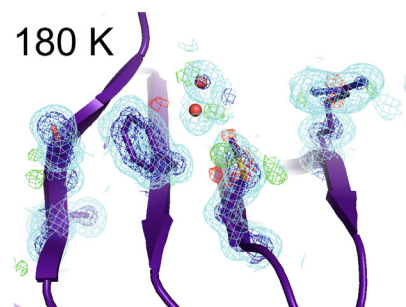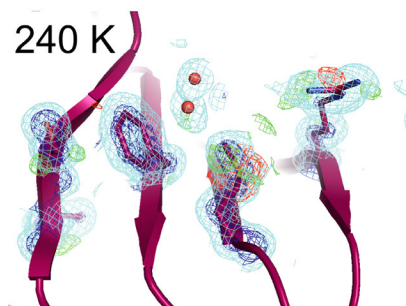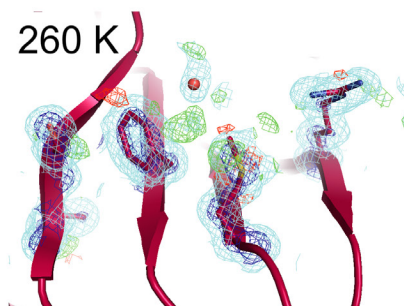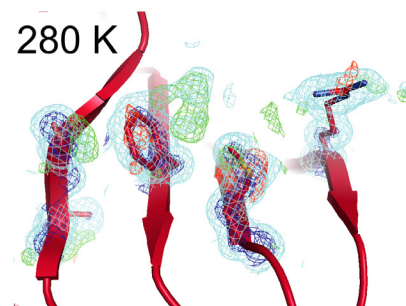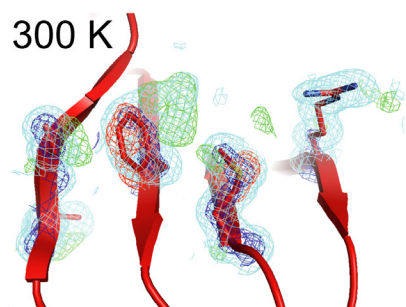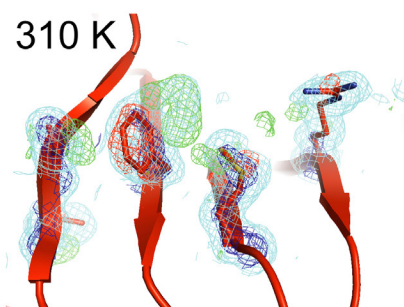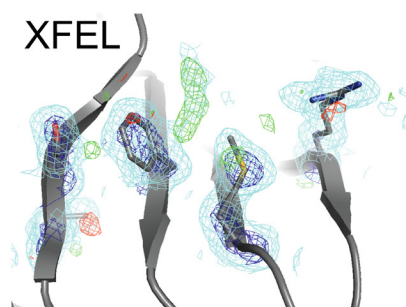

Supplement: supp [file elife-07574-supp-v1.zip]
